# Supplementary material
Source: HighWire-hosted journal article supplement (https://emboj.embopress.org/content/26/11/2743)
Supplement: inline-supplementary-material-2 [file inline-supplementary-material-2.pdf]

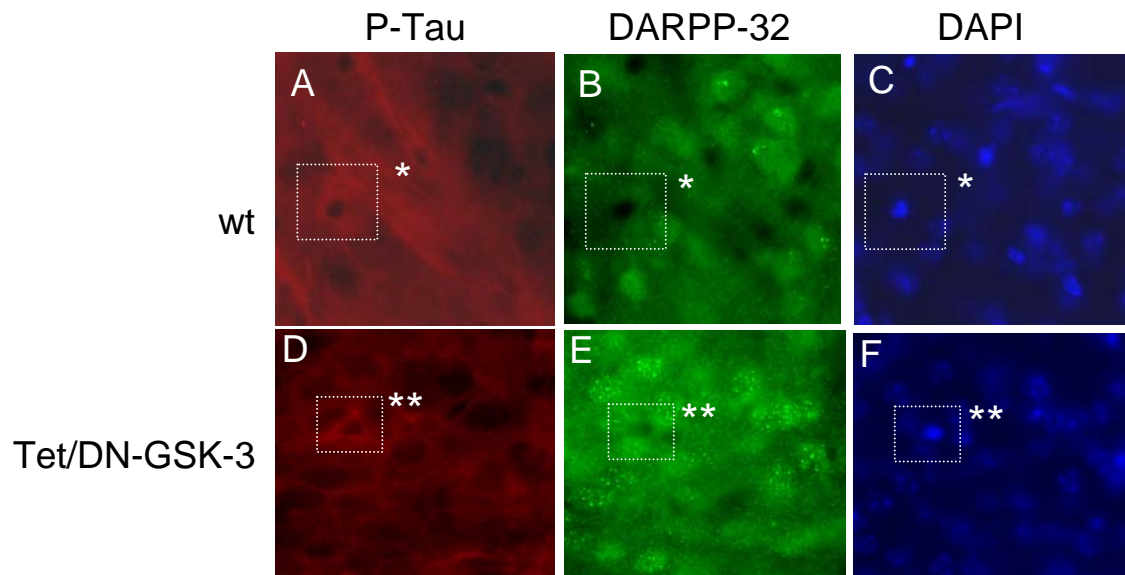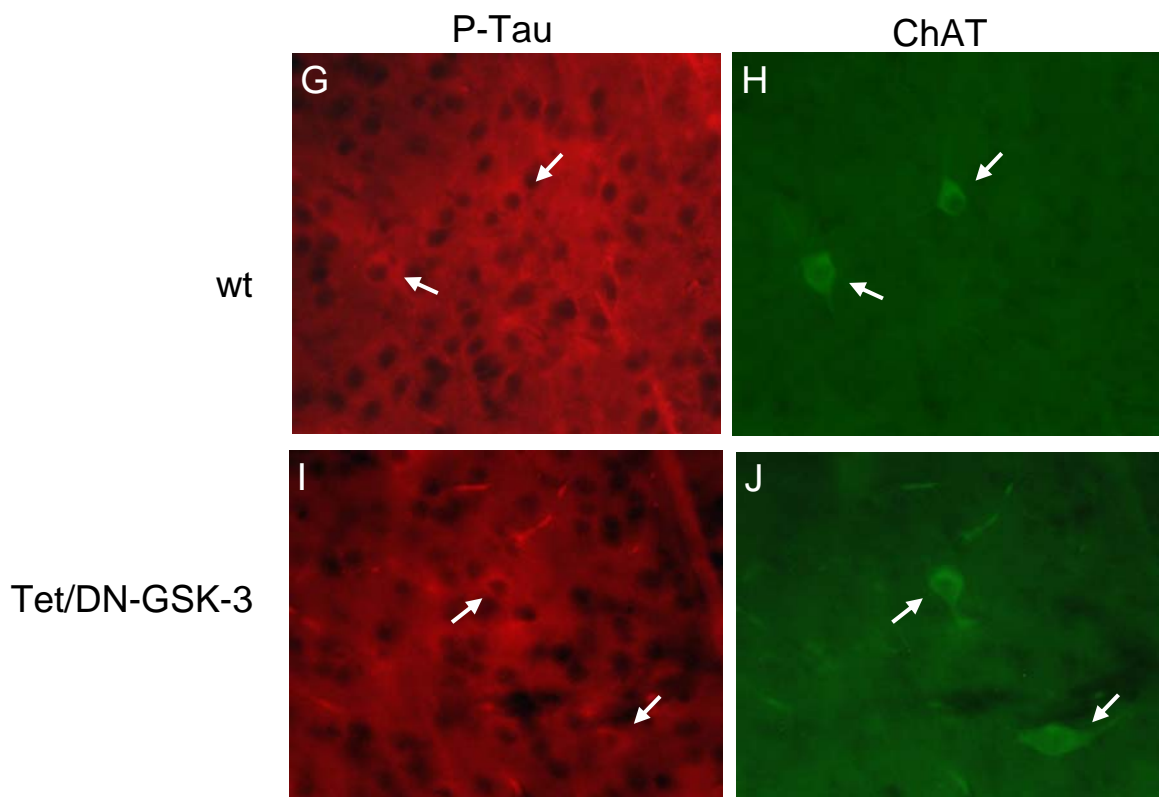

**Supplementary figure 2. Analysis of the neuronal types and of the subcellular localization in which decreased phospho-tau immunoreactivity takes place**

Double labeling immunofluorescence with PHF-1 antibody (P-Tau) and with markers of specific striatal subpopulations (DARPP-32 and ChAT).

A-F, double labeling with P-Tau antibody and the marker of medium sized spiny neurons (DARPP-32). Note that P-Tau staining (A and D) is predominantly located in the neuropil and that it is decreased in Tet/DN-GSK-3 mice. Also note that the few neurons that accumulate P-tau in their somas (squared neurons \*, \*\*) are DARPP-32-negative.

G-J, double labeling with P-Tau antibody and the marker of cholinergic large interneurons (ChAT). Note that the few neurons that accumulate P-tau in their somas (arrows) are ChAT-positive.
